# Supplementary material for: Laminar Flow Attenuates Macrophage Migration Inhibitory Factor Expression in Endothelial Cells
Source: PubMed Central journal article supplement (PMC5799263; doi:10.1038/s41598-018-20885-1), 2018-02-05

# Laminar Flow Attenuates Macrophage Migration Inhibitory Factor Expression in Endothelial Cells

Congzhen Qiao<sup>1,2</sup>, Shengdi Li<sup>3,4</sup>, Haocheng Lu<sup>5</sup>, Fan Meng<sup>6</sup>, Yanbo Fan<sup>5</sup>, Yanhong Guo<sup>5</sup>, Y. Eugene Chen<sup>1, 5, \*</sup>, Jifeng Zhang<sup>5, \*</sup>

## **Affiliations:**

1. Department of Pharmacology, University of Michigan Medical Center, Ann Arbor, Michigan, 48109, USA
2. Shanghai Jiao Tong University School of Medicine, Shanghai, 200025, China
3. Key Lab of Computational Biology, CAS-MPG Partner Institute for Computational Biology, Shanghai Institutes for Biological Sciences, Chinese Academy of Sciences, Shanghai, 200031, China
4. University of Chinese Academy of Sciences, Beijing, 100049, China
5. Frankel Cardiovascular Center, Department of Internal Medicine, University of Michigan Medical Center, Ann Arbor, Michigan, 48109, USA
6. Department of Psychiatry and Molecular and Behavioral Neuroscience Institute, University of Michigan Medical Center, Ann Arbor, Michigan, 48109, USA

\* Correspondence and requests for materials should be addressed to JZ (email: [jifengz@umich.edu](mailto:jifengz@umich.edu)) or YEC (email: [echenum@umich.edu](mailto:echenum@umich.edu))

## Supplementary table 1. Primers used for PCR

| Gene Name                | Species | Forward                       | Reverse                      |
|--------------------------|---------|-------------------------------|------------------------------|
| <b>KLF2</b>              | human   | 5'-CTACACCAAGAGTTCGCATCTG-3'  | 5'-GTGCCGTTTCATGTGCAG-3'     |
| <b>ACTB</b>              | human   | 5'-TGACATTAAGGAGAAGCTGTGC-3'  | 5'-TGGAGTTGAAGGTAGTTTCGTG-3' |
| <b>MIF</b>               | human   | 5'-ATGTTTCATCGTAAACACCAACG-3' | 5'-CTTGCTGTAGGAGCGGTTCTG-3'  |
| <b>HPRT1</b>             | human   | 5'-TCGAGATGTGATGAAGGAGATG-3'  | 5'-TTTATGTCCCCTGTTGACTGGT-3' |
| <b>18S</b>               | human   | 5'-GGAAGGGCACCACCAGGAGT-3'    | 5'-TGCAGCCCCGGACATCTAAG-3'   |
| <b>ChIP-MIF-Promoter</b> | human   | 5'-TTGTCCTCTTCCTGCTATGTCA-3'  | 5'-GGTAAACTCGGGGACCATCTA-3'  |
| <b>ChIP-MIF-Neg-ctrl</b> | human   | 5'-TCATCTTCAAAGCCGGTAATG-3'   | 5'-AGGGAGATTAGCATGGAGCAT-3'  |

# Supplemental figure 1. Whole blot for Figure 2B

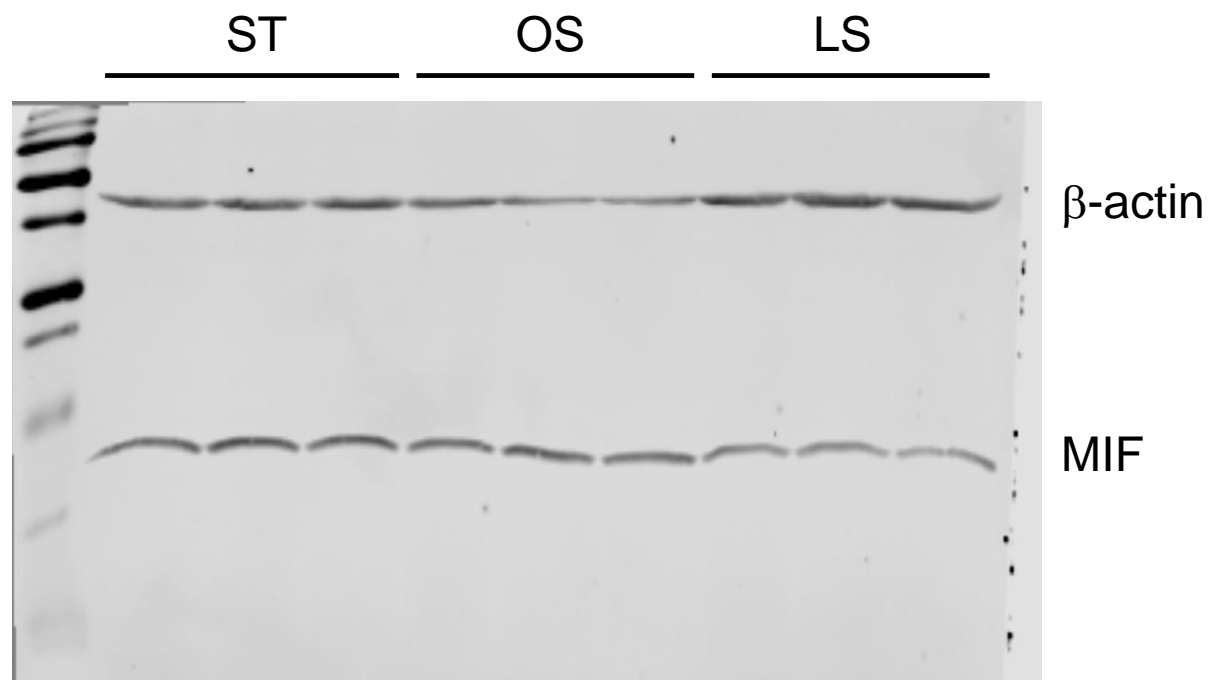

## Supplemental figure 2. Whole blot for Figure 3C

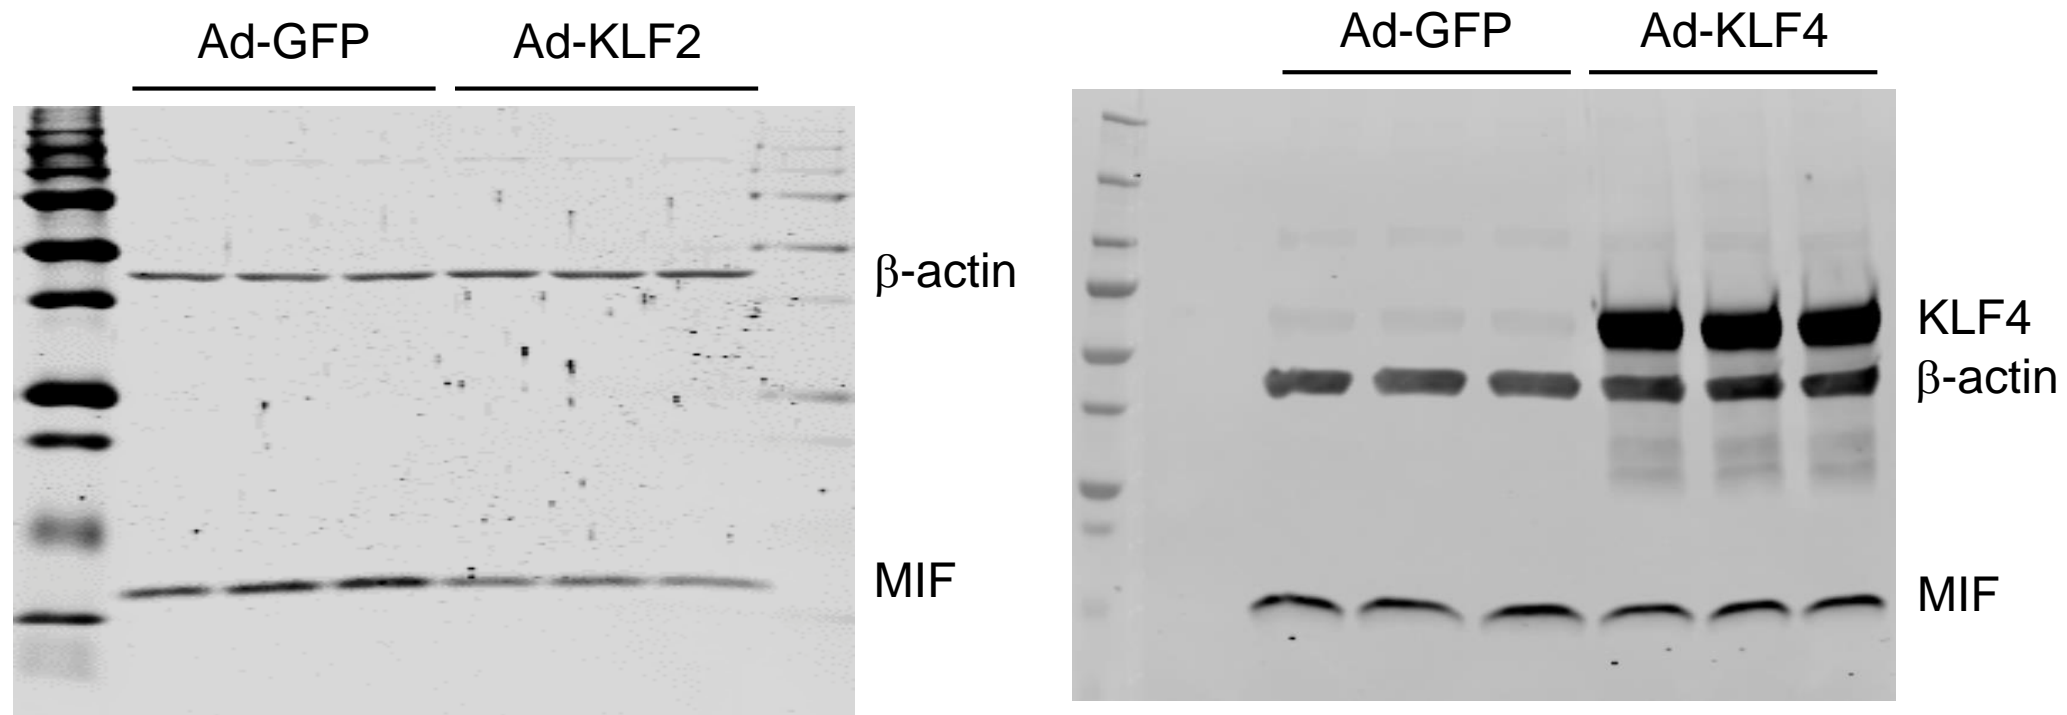

### Supplemental figure 3. Whole blot for Figure 3C

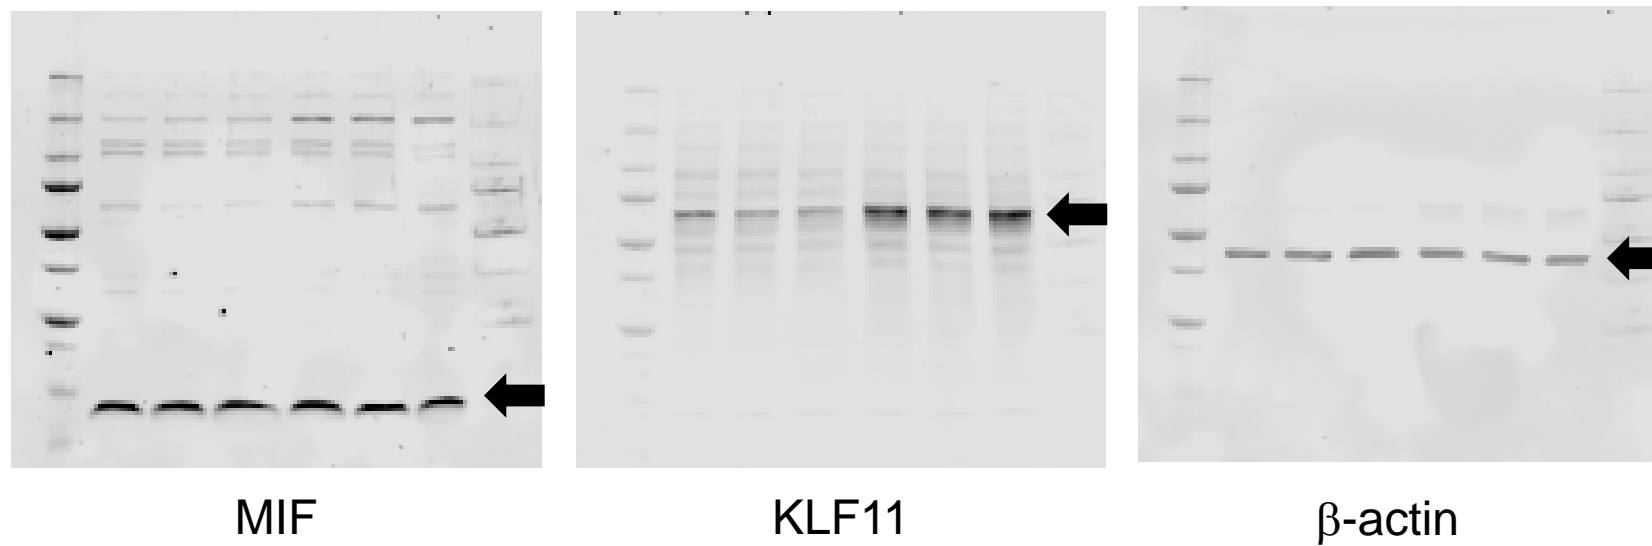

## Supplemental figure 4. Whole blot for Figure 4C

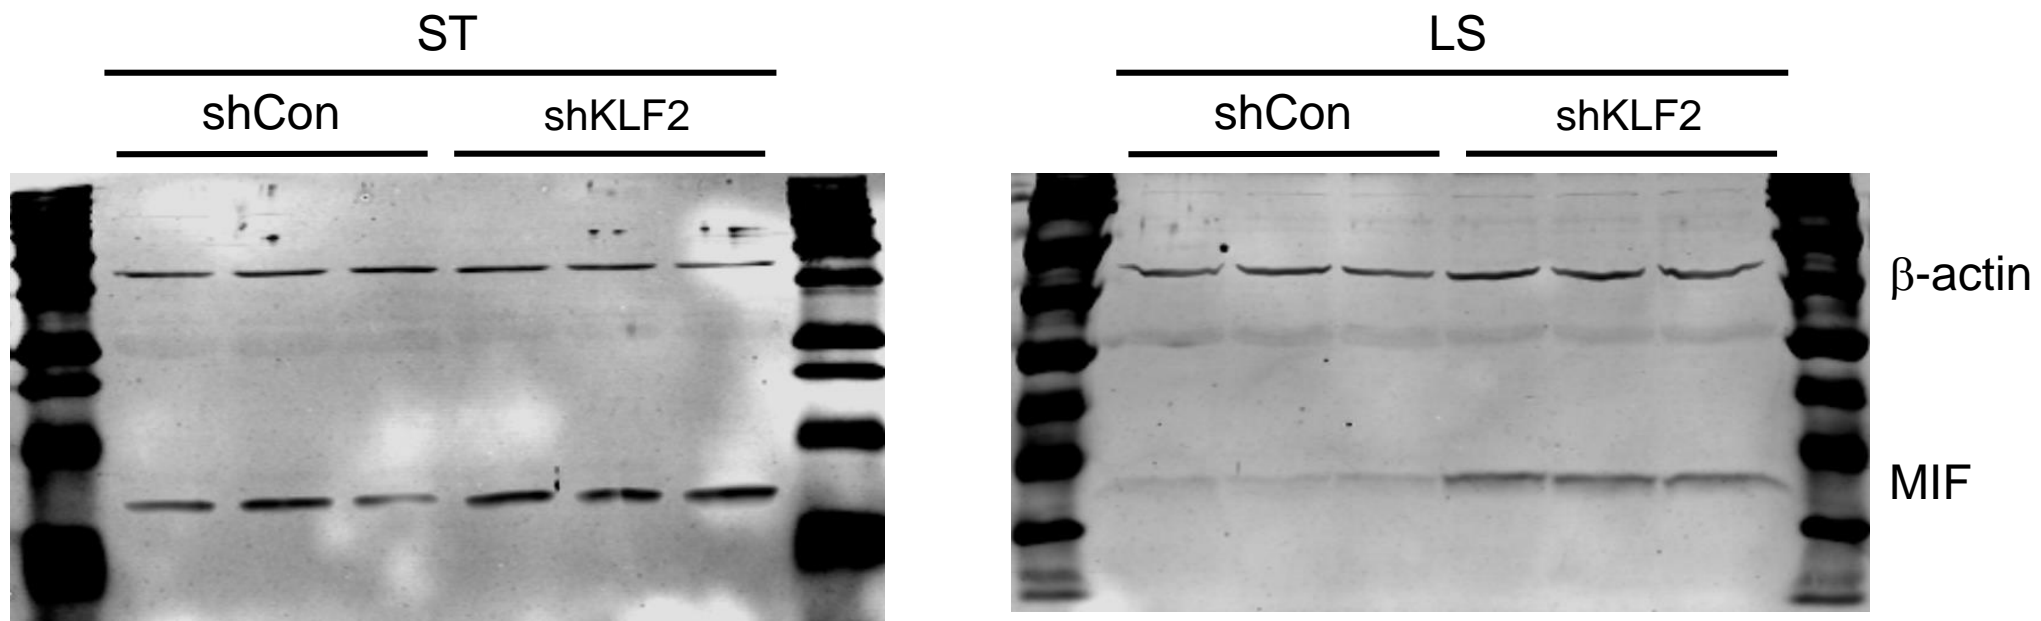

Supplement: 41598_2018_20885_MOESM1_ESM.pdf [file 41598_2018_20885_MOESM1_ESM.pdf]
